# Supplementary material for: Developing a Simple Artificial Intelligence Fuzzy-based Model for Estimating Saturated Hydraulic Conductivity of Soil
Source: Research Square preprint supplement (doi:10.21203/rs.3.rs-6733829/v1), 2025-06-13
Supplement: Supplementary file 1 [file c3397b4e26de16797296137b.docx]

Table 1: Specifications of the soils used

| Soil Texture | Clay (%) | Loam (%) | Sand (%) | *p*b | Ks |
| --- | --- | --- | --- | --- | --- |
| Clay | 48.4 | 33.2 | 18.4 | 1.39 | 0.45 |
| Loam | 23.26 | 33.2 | 43.6 | 1.46 | 3.17 |
| Sandy Loam | 16.4 | 28.6 | 55 | 1.42 | 5.6 |
| Clay Loam | 32.4 | 33.9 | 33.6 | 1.5 | 1.93 |
| Silt Loam | 18.4 | 51 | 30.6 | 1.43 | 0.88 |

Table 2- Test results for various input parameter combinations.

| Scenario | Input combination | Variables | Gamma | Gradient | V-Ratio |
| --- | --- | --- | --- | --- | --- |
| 1 | 1111 | Clay, Silt, Sand, Pb | 0.177 | 0.0889 | 0.7080 |
| 2 | 1011 | Clay, Sand, Pb | 0.1785 | -0.335 | 0.714 |
| 3 | 0011 | Sand, Pb | 0.2305 | -10.836 | 0.922 |

Table 3- Evaluation results and performance criteria for different models predicting saturated hydraulic conductivity during the training and testing phases.

| Scenario | Model | Input | Train | | |  | Test | | |  |
| --- | --- | --- | --- | --- | --- | --- | --- | --- | --- | --- |
| R2 | RMSE | MBE |  | R2 | RMSE | MBE |  |
| 1 | DLLR | 1111 | 0.99 | 0.0068 | 0.0037 |  | 0.341 | 0.428 | -0.159 |  |
| 2 | 1011 | 0.99 | 0.004 | 0.00036 |  | 0.402 | 0.4022 | -0.1416 |  |
| 3 | 0011 | 0.984 | 0.0062 | 0.00038 |  | 0.391 | 0.418 | 0.144 |  |
| 1 | ANNBFGS | 1111 | 0.297 | 0.420 | 0.00038 |  | 0.213 | 0.434 | -0.100 |  |
| 2 | 1011 | 0.293 | 0.422 | 0.011 |  | 0.276 | 0.4078 | -0.062 |  |
| 3 |  | 0011 | 0.156 | 0.431 | 0.00037 |  | 0.2050 | 0.422 | 0.0311 |  |
| 1 | ANNC-G | 1111 | 0.296 | 0.420 | 0.00039 |  | 0.188 | 0.431 | -0.062 |  |
| 2 | 1011 | 0.295 | 0.422 | -0.004 |  | 0.293 | 0.411 | -0.0913 |  |
| 3 | 0011 | 0.183 | 0.453 | 0.00038 |  | 0.125 | 0.434 | 0.0247 |  |
| 1 | FUZZY | 1111 | 0.85 | 1.64 | 0.28 |  | 0.83 | 1.65 | 0.36 |  |
| 2 | 1011 | 0.81 | 1.82 | 0.38 |  | 0.62 | 2.62 | 0.83 |  |
| 3 | 0011 | 0.56 | 2.99 | 0.95 |  | 0.40 | 3.42 | 1.30 |  |
| 1 | Linear regression | 1111 | 0.214 | 3.488 | 0.0001 |  | 0.301 | 3.319 | 0.430 |  |
| 2 | 1011 | 0.213 | 3.488 | 0.0001 |  | 0.302 | 3.299 | -0.140 |  |
| 3 | 0011 | 0.139 | 3.650 | 0.0001 |  | 0.189 | 3.532 | 0.177 |  |

Table 4: Linear Regression Model Coefficients

|  | Model coefficients | | | | Width from the origin | Model |
| --- | --- | --- | --- | --- | --- | --- |
| R2test | Pb | %Sand | %Silt | %Clay |
| 0.301 | -2.93 | 0.25 | 0.23 | 0.10 | -13 | 1 |
| 0.302 | -2.93 | 0.147 | 0.128 | - | -3.4 | 2 |
| 0.189 | -0.02 | 0.0587 | - | - | 0.83 | 3 |

1- Ks = - 13 - 2.93 Bulk density + 0.25 sand% + 0.10 clay% + 0.23 silt%

2- Ks= - 3.40 + 0.128 silt% + 0.147 sand% - 2.93 Bulk density

3- Ks= 0.83 + 0.0587 sand% - 0.02 Bulk density
