# Supplementary material for: Developing a Simple Artificial Intelligence Fuzzy-based Model for Estimating Saturated Hydraulic Conductivity of Soil
Source: Research Square preprint supplement (doi:10.21203/rs.3.rs-6733829/v1), 2025-06-13
Supplement: Supplementary file 2 [file e7555da0dc824a086df86af0.docx]

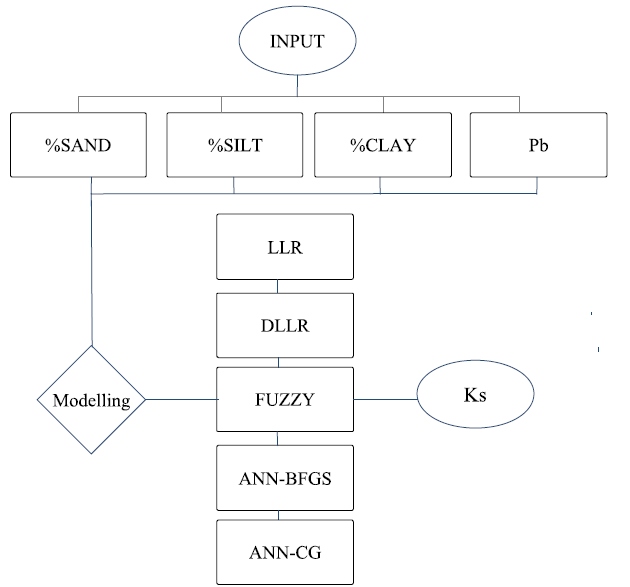


Figure 1: Flowchart for the Modelling of saturated hydraulic conductivity of soil

| 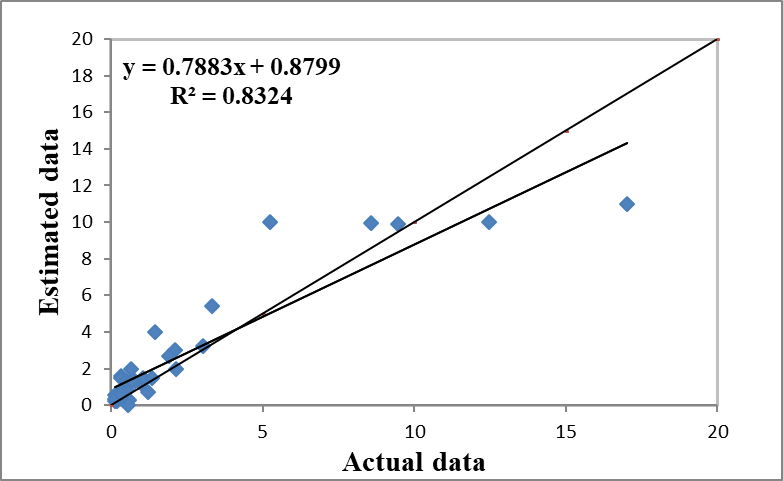(b) | 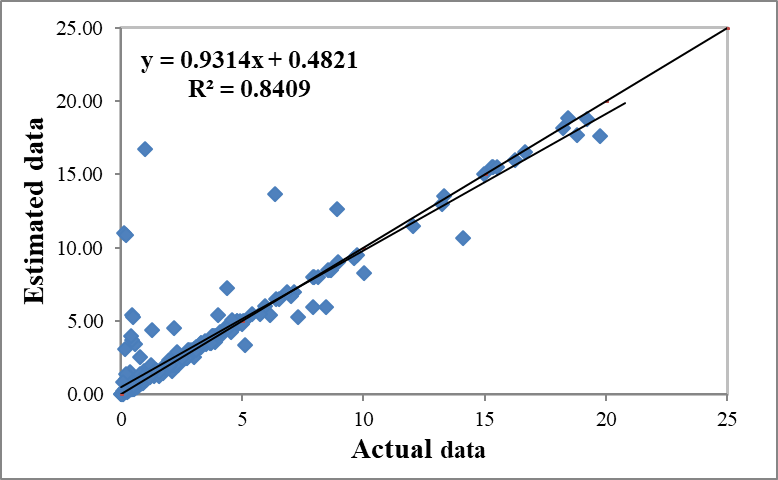(a) |
| --- | --- |
| Figure 1: Comparison of the fuzzy model's calculated saturated hydraulic conductivity with four inputs (a - model training) and (b - model testing). | |

| 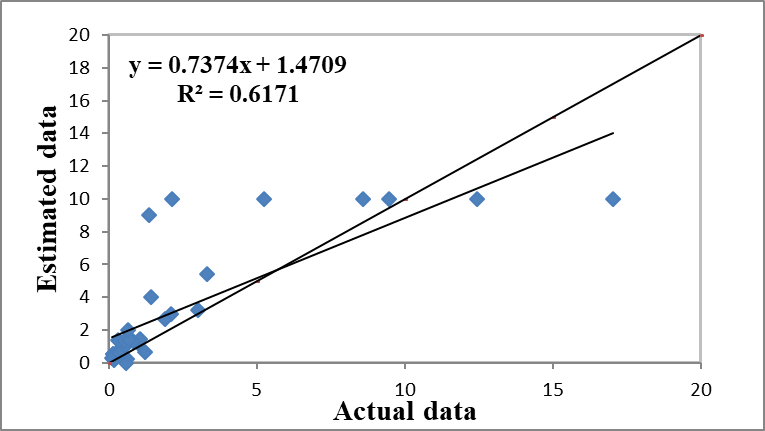 (b) | | 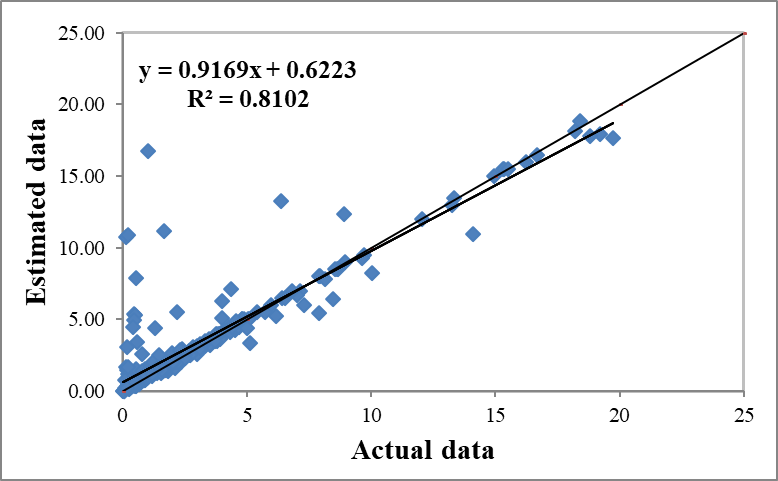 (a) | |
| --- | --- | --- | --- |
| Figure 2: Comparison of the fuzzy model's calculated saturated hydraulic conductivity with three inputs (a - model training) and (b - model testing). | | | |
| 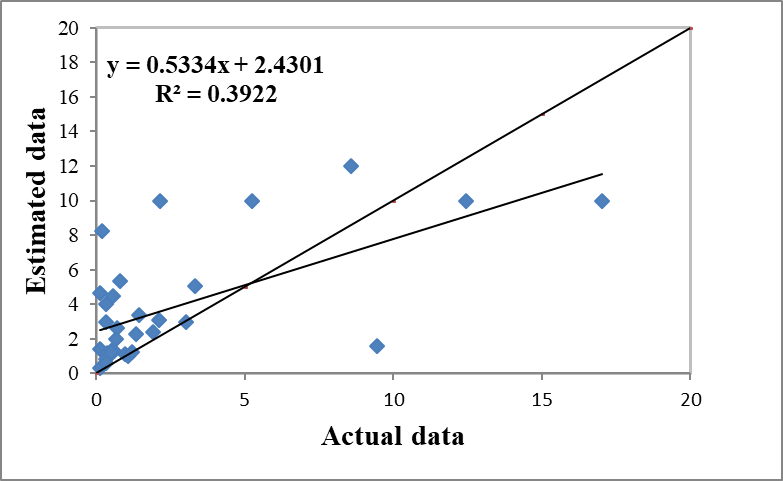(b) | 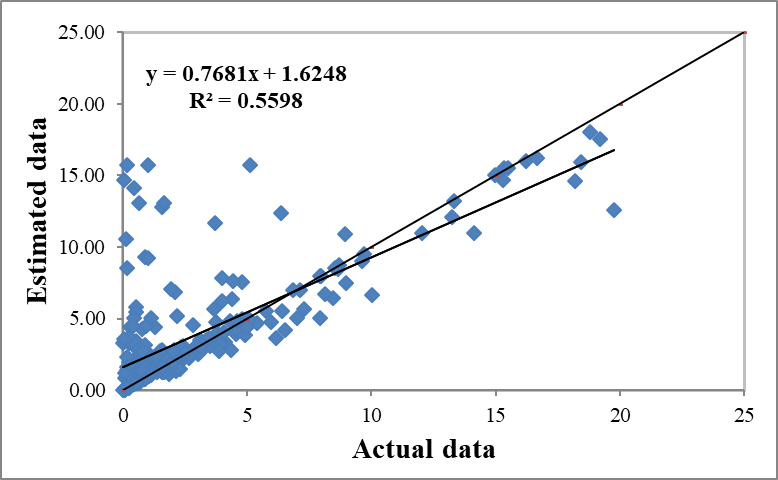(a) | |
| Figure 3: Comparison of the fuzzy model's calculated saturated hydraulic conductivity with two inputs (a - model training) and (b - model testing). | | |
